# Supplementary material
Source: HighWire-hosted journal article supplement (https://www.jneurosci.org/content/suppl/2007/11/14/27.46.12623)

Supplemental Figure 2, Lagace et al.

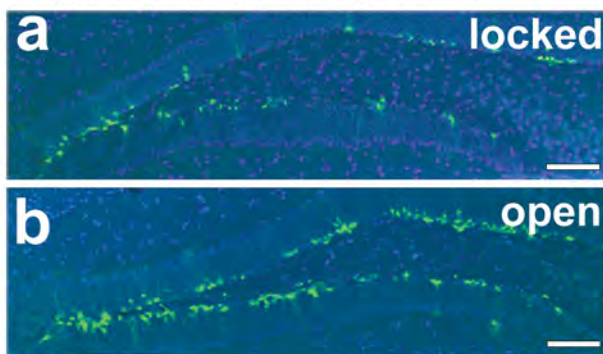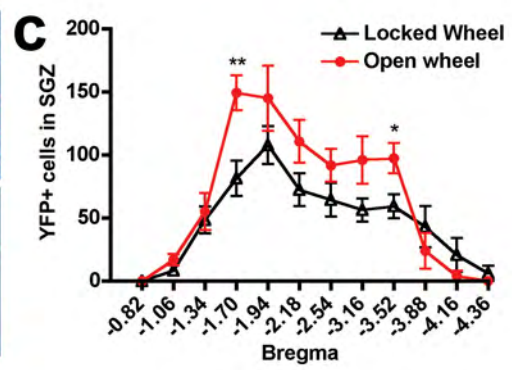

Supplement: Supplemental_Figure_2.pdf [file Supplemental_Figure_2.pdf]
